# Supplementary material for: Population Structure and Genetic Diversity of Italian Beef Breeds as a Tool for Planning Conservation and Selection Strategies
Source: MDPI journal article supplement (doi:10.3390/ani9110880), 2019-10-29

CAL sex ratio

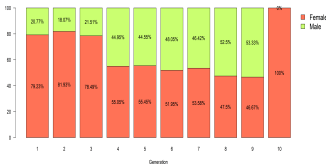

MUP sex ratio

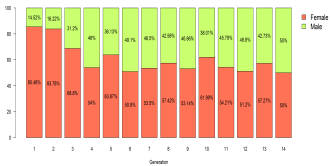

PON sex ratio

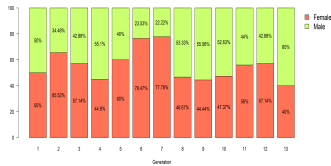

SAR sex ratio

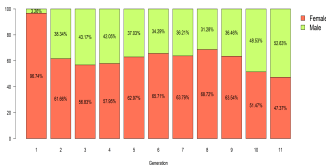

SAB sex ratio

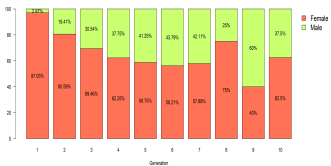

SAM sex ratio

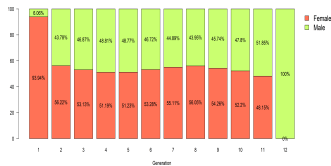

CHA sex ratio

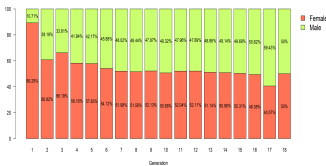

LIM sex ratio

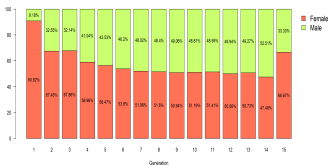

Supplement: s1 [file s1]
